# Supplementary material for: Multicentre, randomised, open-label, phase IV–III study to evaluate the efficacy of cloxacillin plus fosfomycin versus cloxacillin alone in adult patients with methicillin-susceptible Staphylococcus aureus bacteraemia: study protocol for the SAFO trial
Source: PubMed Central journal article supplement — BMJ Open. 2021 Aug 5;11(8):e051208. doi: 10.1136/bmjopen-2021-051208 (PMC8344278; doi:10.1136/bmjopen-2021-051208), 2021-08-05
Supplement: bmjopen-2021-051208supp001.pdf [file bmjopen-2021-051208supp001.pdf]

## 1    **Supplementary material**

2    **List of study sites:** Hospital Universitari de Bellvitge, Hospitalet de Llobregat, Barcelona;  
3    Hospital Universitari Clínic de Barcelona; Hospital Universitari Santa Creu i Sant Pau, Barcelona;  
4    Hospital Universitari Parc de Salut Mar, Barcelona; Hospital Universitari Joan XXIII, Tarragona;  
5    Hospital Universitari Arnau de Vilanova, Lleida; Hospital Universitari Mútua de Terrassa,  
6    Barcelona; Corporació Sanitària Parc Taulí, Sabadell, Barcelona; Hospital Universitari Sant Joan,  
7    Reus; Hospital Universitario M.Broggi, Sant Joan Despí, Barcelona; Hospital Universitario 12 de  
8    Octubre, Madrid; Hospital Universitario Virgen Macarena, Seville; Hospital Universitario de  
9    Cruces, Barakaldo; Hospital Universitario Lucus Augusti, Lugo; Hospital Clínico Universitario de  
10    Zaragoza, Zaragoza; Hospital Universitario Ramón y Cajal, Madrid; Hospital Universitari  
11    Germans Trias, Badalona; Hospital Universitario Álvaro Cunqueiro, Vigo; Hospital de Barcelona,  
12    Barcelona; Hospital Universitario La Paz, Madrid.

13    Other hospitals may be added during the course of the clinical trial.

14

## 15    **Microbiological studies**

16    In fosfomycin resistant SASM strains, synergy studies between cloxacilin and fosfomycin will be  
17    assessed by E-test and time-kill assays.

18    For the time-kill assays 0.25, 0.5 and 1 fold MIC for each antibiotic will be tested. Synergy for  
19    the combination is defined as  $>2 \log_{10}$  CFU/mL decrease in comparison with that by the most  
20    active antibiotic of the combination tested, and antagonism is defined as  $>2 \log_{10}$  CFU/mL  
21    increase.

22    For the E-test, we calculate the fractional inhibitory concentration index (FICI) with the  
23    following formula:  $FICI = (MICCF/MICC) + (MICBFC/MICF)$ , where MICCF is the MIC of cloxacillin  
24    tested in combination with fosfomycin, MICC and MICF are the MIC of cloxacillin and  
25    fosfomycin tested alone, MICFC is the MIC of fosfomycin tested in combination with cloxacillin.

26    Synergy is defined as a FICI  $\leq 0.5$ , indifference as a FICI between  $>0.5$  and 4 and antagonism as a

27 FICI > 4.

28

29 **Safety outcomes**

30 We will compare incidence of serious adverse events (SAEs) in both group. Particularly, we will  
31 assess the incidence of acute cardiac failure, hypokalemia, hypocalcemia, methabolic alkalosis  
32 and hypernatremia.

33

34 Additional ethical information

35 Patients' data will be anonymised; each patient will be identified by a code. Only the study  
36 physician and collaborators will have access to patients' clinical histories. Consequently,  
37 patients' identities will not be revealed to any other person, except in cases of medical  
38 emergency or if required by law. Access to patient information will be restricted to the study  
39 physician and collaborators, the health authorities (AEMPS), the Clinical Research Ethics  
40 Committee, and personnel authorised by the sponsor when they need to check the data and  
41 procedures used in the study, but always maintaining the confidentiality of the information in  
42 accordance with the current legislation.

## **HOJA DE INFORMACIÓN AL PACIENTE**

**Título del estudio:** “Ensayo clínico de fase IV-III, con asignación aleatoria, controlado, abierto y multicéntrico, con dos grupos paralelos, para evaluar la eficacia de la combinación de Cloxacilina y Fosfomicina versus cloxacilina en monoterapia en el tratamiento de la bacteriemia por *Staphylococcus aureus* sensible a la Meticilina”

**Código del estudio:** HUB-IDIBELL-SAFO-4.3.1.

**EudraCT num.:** 2018-001207-37

**Promotor:** Dr. Miquel Pujol i Rojo del Servicio de Enfermedades Infecciosas del Hospital Universitari de Bellvitge

**Investigador principal:**

**Centro:**

### **INTRODUCCIÓN**

Nos dirigimos a usted para informarle sobre un estudio de investigación en el que se le invita a participar. El estudio ha sido aprobado por el Comité de Ética de la Investigación con medicamentos y por la Agencia Española de Medicamentos y Productos Sanitarios, de acuerdo a la legislación vigente, el Real Decreto 1090/2015 de 4 de diciembre y el Reglamento Europeo 536/2014 de 16 de abril, por los que se regulan los ensayos clínicos con medicamentos.

Nuestra intención es que usted reciba la información correcta y suficiente para que pueda decidir si acepta o no participar en este estudio. Para ello lea esta hoja informativa con atención y nosotros le aclararemos las dudas que le puedan surgir.

Además, puede consultar con las personas que considere oportuno.

### **PARTICIPACIÓN VOLUNTARIA**

Debe saber que su participación en este estudio es voluntaria y que puede decidir no participar. Si decide participar, puede cambiar su decisión y retirar el consentimiento en cualquier momento, sin que por ello se altere la relación con su médico ni se produzca perjuicio alguno en su atención sanitaria.

### **OBJETIVO DEL ESTUDIO**

La bacteriemia por *Staphylococcus aureus*, que es la enfermedad que usted padece ahora, es una infección muy frecuente y que presenta una elevada mortalidad. El tratamiento actual es la Cloxacilina como único fármaco.

El objetivo es establecer si añadir otro antibiótico (Fosfomicina) al tratamiento habitual con Cloxacilina mejora el pronóstico de esta infección.

Código del Protocolo: HUB-IDIBELL-SAFO-4.3.1  
EudraCT num: 2018-001207-37

## **HOJA DE INFORMACIÓN AL PACIENTE**

### **DESCRIPCIÓN DEL ESTUDIO**

El presente estudio prevé la inclusión de 366 pacientes y se realizará en 15 diferentes hospitales en toda España.

Tanto la Cloxacilina como la Fosfomicina son fármacos que ya están comercializados y se utilizan en la práctica clínica habitual.

El estudio pretende que algunos pacientes además de recibir el tratamiento con cloxacilina (que es el tratamiento habitual de esta infección) reciban también otro antibiótico asociado, la fosfomicina. La combinación de estos dos antibióticos pretende mejorar el control de la infección y así disminuir las complicaciones que esta infección comporta.

Los pacientes recibirán el tratamiento de estudio o el tratamiento habitual. El que Usted reciba el tratamiento de estudio (Cloxacilina + Fosfomicina) o el tratamiento habitual (Cloxacilina sola) será determinado por el azar a través de una asignación por un programa informático. Usted tiene la misma probabilidad que le toque uno u otro tratamiento.

Por el diseño del estudio, tanto su médico habitual como usted sabrán en todo momento que medicación está recibiendo. La medicación será administrada por vía intravenosa.

### **ACTIVIDADES DEL ESTUDIO**

El tratamiento de estudio durará 7 días, después de los cuales el tipo de tratamiento y la duración serán decididos por su médico habitual según la práctica clínica habitual. El seguimiento será de 12 semanas después del comienzo del tratamiento.

Si acepta participar en el estudio, además de las visitas que realizará su equipo médico habitual, se le realizarán 5 visitas extras (el primero, tercero y séptimo día de tratamiento, al final del tratamiento total y después de 12 semanas desde el comienzo del tratamiento). En caso que usted lo necesite (si presentara fiebre por ejemplo) se le realizará una visita extra entre la visita 4 y la visita 5.

Durante las visitas de la 1 a la 5, y en la visita extra si lo requiriese, el equipo investigador realizará una evaluación clínica que incluirá ver si tiene fiebre, conocer su tensión arterial y exploración física general. Comprobará también los resultados de análisis de sangre (hemograma, función renal y hepática, iones y equilibrio ácido-base venoso) que le haya realizado su equipo médico ese día.

También durante todas las visitas se solicitarán 2 muestras de sangre de 10 mL (hemocultivos) para asegurar que la bacteria que le ha producido la enfermedad ha desaparecido de su sangre.

Durante el estudio no se le realizarán analíticas complementarias a las que se realizan en la práctica habitual de su enfermedad.

Las muestras obtenidas se utilizaran para los análisis del estudio, pero no se prevé su almacenamiento una vez concluidos los análisis del estudio.

Versión 4.0 del 10 de junio de 2020

Página 2 de 10

**Código del Protocolo: HUB-IDIBELL-SAFO-4.3.1**  
**EudraCT num: 2018-001207-37**

| <b>HOJA DE INFORMACIÓN AL PACIENTE</b> Visita 1                                                                                                                                                   | Visita 2                                    | Visita 3                                     | Visita 4                                                                    | Visita 5                                |
|---------------------------------------------------------------------------------------------------------------------------------------------------------------------------------------------------|---------------------------------------------|----------------------------------------------|-----------------------------------------------------------------------------|-----------------------------------------|
| Día de la inclusión                                                                                                                                                                               | Día +3 desde inicio tratamiento del estudio | Día + 7 desde inicio tratamiento del estudio | A las 48 h de la finalización del ciclo de tratamiento antibiótico completo | + 12 semanas de la asignación aleatoria |
| Exploración física                                                                                                                                                                                | Exploración física                          | Exploración física                           | Exploración física                                                          | Exploración física                      |
| Test de embarazo                                                                                                                                                                                  |                                             |                                              |                                                                             |                                         |
| Obtención de muestra de sangre (10 mL)                                                                                                                                                            | Obtención de muestra de sangre (10 mL)      | Obtención de muestra de sangre (10 mL)       | Obtención de muestra de sangre (10 mL)                                      | Obtención de muestra de sangre (10 mL)  |
| En caso de fiebre o síntomas de infección entre la visita 4 y la visita 5, se realizará una visita extraordinaria donde se le realizará una exploración física y se obtendrán muestras de sangre. |                                             |                                              |                                                                             |                                         |

## RIESGOS Y MOLESTIAS DERIVADOS DE SU PARTICIPACIÓN EN EL ESTUDIO

Los fármacos utilizados en este estudio están autorizados para el tratamiento de la enfermedad que Usted padece. Están comercializados desde hace muchos años y se utilizan en la práctica clínica habitual.

Los efectos secundarios principales que pueden presentarse con ambos fármacos son la sobrecarga de sodio y la posibilidad de un descenso del potasio. La sobrecarga de sodio, podría desencadenar episodios de insuficiencia cardíaca y será valorada en las visitas y se administrará tratamiento diurético cuando sea necesario. La hipokalemia (descenso del potasio en sangre), se puede corregir con la administración de potasio a través de sueros o por vía oral. Ambas eventualidades serán valoradas y se realizarán controles y medidas para evitar su desarrollo. Otros efectos secundarios descritos con la fosfomicina son: reacciones cutáneas por hipersensibilidad, aumento transitorio de los enzimas hepáticos, náuseas, diarreas, hipocalcemia (descenso de calcio en sangre) y alcalosis metabólica.

Al ser, tanto la cloxacilina como la fosfomicina, fármacos aprobados por las autoridades sanitarias competentes, existe información al acceso de todo el mundo sobre los efectos secundarios. Por favor, hable con el médico de su estudio para obtener una lista completa de los efectos secundarios comunicados con este fármaco y en cualquier caso se le entregará el prospecto del fármaco.

Si acepta participar al estudio, acepta acudir a las visitas de seguimiento y de notificar cualquier evento adverso que le suceda o cambios en medicación, advirtiéndolo que, excepto en caso de urgencia, no modifique la medicación que está tomando ni tome otros medicamentos o "plantas medicinales" sin consultar antes con el médico del estudio.

**Versión 4.0 del 10 de junio de 2020**

Página 3 de 10

Código del Protocolo: HUB-IDIBELL-SAFO-4.3.1  
EudraCT num: 2018-001207-37

## **HOJA DE INFORMACIÓN AL PACIENTE**

Todos los procedimientos que se realizarán durante el ensayo clínico son procedimientos habituales de la práctica clínica. La participación al ensayo supone la extracción de muestras de sangre (hemocultivos) en diferentes momentos, que no difiere de la práctica clínica habitual. Este procedimiento, aunque de bajo riesgo, en ocasiones puede producir hemorragias, hematomas, molestias, infecciones y/o dolor en el punto de extracción de sangre. También puede sentirse mareado.

Los posibles riesgos derivados del procedimiento realizado para la obtención de estas muestras estarán cubiertos por la póliza del seguro del centro hospitalario.

La realización de pruebas diagnósticas (pruebas de imagen o de obtención de muestras clínicas) o terapéuticas invasivas (drenaje de material purulento, desbridamiento quirúrgico), se realizarán según la práctica clínica habitual. La participación al presente ensayo no supone realizar más pruebas de las necesarias.

### **POSIBLES BENEFICIOS**

El posible beneficio de su participación en el estudio es la mejora del tratamiento de la patología en los futuros pacientes. De todas maneras, es posible que no obtenga ningún beneficio para su salud por participar en este estudio.

### **ADVERTENCIA RELATIVA AL EMBARAZO**

Se realizará un test de embarazo antes del comienzo del estudio en las mujeres en edad fértil. Los fármacos empleados en este estudio deben evitarse durante el embarazo. No hay literatura que haya demostrado toxicidad fetal en caso de uso de Cloxacilina. Para lo que concierne la Fosfomicina, se ha demostrado toxicidad para el feto en animales sólo a dosis que provocarían toxicidad materna.

En caso de producirse un embarazo durante su participación en el estudio debe informar a su médico de inmediato para recibir la asistencia médica adecuada. Se solicitará el consentimiento de la recogida de datos del mismo y de datos de salud del bebé hasta 3 meses después (Ley Orgánica 3/2018 de Protección de Datos Personales y garantía de los derechos digitales).

### **TRATAMIENTOS ALTERNATIVOS**

No existen actualmente tratamientos alternativos que hayan demostrado la superioridad respecto al tratamiento habitual con Cloxacilina. Dada la elevada mortalidad de la enfermedad, en la práctica clínica habitual se utilizan diferentes combinaciones de tratamiento, sin que éstas hayan demostrado ser más eficaces que el tratamiento de la cloxacilina sola. Si el paciente decide no participar en el estudio, podría recibir esta misma combinación u otro tratamiento.

Versión 4.0 del 10 de junio de 2020

Página 4 de 10

**Código del Protocolo: HUB-IDIBELL-SAFO-4.3.1**  
**EudraCT num: 2018-001207-37**

## **HOJA DE INFORMACIÓN AL PACIENTE**

### **SEGURO**

Para la participación en este estudio Usted estará cubierto por la póliza de seguro de cada centro hospitalario. No está previsto contratar un seguro específico.

Le informamos que es posible que su participación en este ensayo clínico pueda modificar las condiciones generales y particulares (cobertura) de sus pólizas de seguros (vida, salud, accidente), por ello, le recomendamos que se ponga en contacto con su compañía de seguros y le informe de su participación en el mismo para determinar si podría afectar a su póliza de seguro actual o en el caso de que vaya a contratar una póliza nueva.

### **PROTECCIÓN DE DATOS PERSONALES**

Tanto el Centro como el Promotor son responsables respectivamente del tratamiento de sus datos y se comprometen al cumplimiento del Reglamento (UE) 2016/679 del Parlamento europeo y del Consejo de 27 de abril de 2016 de Protección de Datos (RGPD), así como al resto de leyes y normativa vigente y aplicable (Ley Orgánica 3/2018 de Protección de Datos Personales y garantía de los derechos digitales ).

Los datos recogidos para el estudio estarán identificados mediante un código, de manera que no se incluya información que pueda identificarle (nombre ni apellidos, iniciales, dirección, nº de la seguridad social, etc), sino un código. El código que le identifica será asignado de manera aleatoria a través de un programa informático. Sólo su médico del estudio/colaboradores podrá relacionar dichos datos con usted y con su historia clínica. Por lo tanto, su identidad no será revelada a ninguna otra persona salvo a las autoridades sanitarias, cuando así lo requieran o en casos de urgencia médica.

Las muestras biológicas del estudio también estarán identificadas por su código asignado en el estudio acompañado del código de la visita, cumpliendo con lo expuesto en el párrafo anterior.

Los Comités de Ética de la Investigación, los representantes de la Autoridad Sanitaria en materia de inspección (Agencia Española de Medicamentos y Productos Sanitarios, autoridades sanitarias extranjeras) y el personal autorizado por el Promotor (monitores, auditores), únicamente podrán acceder para comprobar los datos personales, los procedimientos del estudio clínico y el cumplimiento de las normas de buena práctica clínica (siempre manteniendo la confidencialidad de la información).

El tratamiento, la comunicación y la cesión de los datos de carácter personal de todos los participantes se ajustarán a lo dispuesto en esta ley.

De acuerdo a lo que establece la legislación de protección de datos, usted puede ejercer los derechos de acceso, modificación, oposición y cancelación de datos, para lo cual deberá dirigirse a su médico del estudio. Además también puede limitar el tratamiento de datos que sean incorrectos, solicitar una copia o que se trasladen a un tercero (portabilidad) los datos que usted ha facilitado para el estudio. Para ejercitar sus derechos, diríjase al investigador

**Versión 4.0 del 10 de junio de 2020**

**Código del Protocolo: HUB-IDIBELL-SAFO-4.3.1**  
**EudraCT num: 2018-001207-37**

## **HOJA DE INFORMACIÓN AL PACIENTE**

principal del estudio o al Delegado de protección de datos de la institución, email: [dataprotection@idibell.cat](mailto:dataprotection@idibell.cat).

Si usted decide retirar el consentimiento para participar en este estudio, ningún nuevo dato será añadido a la base de datos, pero los datos que ya se hayan recogido hasta el momento no se podrán eliminar para garantizar la validez de la investigación y cumplir con los deberes legales y los requisitos de autorización de medicamentos. Así mismo tiene derecho a dirigirse a la Agencia de Protección de Datos si no quedara satisfecho.

El Investigador y el Promotor están obligados a conservar los datos recogidos para el estudio al menos hasta 25 años tras su finalización. Posteriormente, su información personal solo se conservará por el centro para el cuidado de su salud y por el promotor para otros fines de investigación científica si usted hubiera otorgado su consentimiento para ello y si así lo permite la ley y requisitos éticos aplicables.

Si se realizara una transferencia de sus datos codificados fuera de la UE a las entidades de nuestro grupo, a prestadores de servicios o a investigadores científicos que colaboren con nosotros, los datos del participante quedarán protegidos con salvaguardas tales como contratos u otros mecanismos por las autoridades de protección de datos. Si el participante quiere saber más al respecto, puede contactar al/ a la Delegado de Protección de Datos del promotor [secretariaserveifecciosos@bellvitgehospital.cat]

## **GASTOS Y COMPENSACIÓN**

En caso de participar en este estudio, usted no tendrá ningún gasto adicional ocasionado por el estudio. No está prevista ninguna compensación económica por participar en el estudio.

## **OTRA INFORMACIÓN RELEVANTE**

Una descripción de este ensayo clínico estará disponible en <http://reec.aemps.es>, según exige la legislación española. Cualquier nueva información referente a los fármacos utilizados en el estudio y que pueda afectar a su disposición para participar en el estudio, que se descubra durante su participación, le será comunicada por su médico lo antes posible.

Debe saber que puede ser excluido del estudio si el promotor o los investigadores del estudio lo consideran oportuno, ya sea por motivos de seguridad, por cualquier acontecimiento adverso que se produzca por la medicación en estudio o porque

consideren que no está cumpliendo con los procedimientos establecidos. En cualquiera de los casos, usted recibirá una explicación adecuada del motivo que ha ocasionado su retirada del estudio.

Al firmar la hoja de consentimiento adjunta, acepta cumplir con los procedimientos del estudio que se le han expuesto.

**Versión 4.0 del 10 de junio de 2020**

Página 6 de 10

Código del Protocolo: HUB-IDIBELL-SAFO-4.3.1  
EudraCT num: 2018-001207-37

## **HOJA DE INFORMACIÓN AL PACIENTE**

Debe usted saber que es posible que su médico de Atención Primaria tenga conocimiento de su participación en este estudio.

### **¿QUÉ TRATAMIENTO RECIBIRÉ CUANDO FINALICE EL ENSAYO CLÍNICO?**

Cuando acabe su participación recibirá el mejor tratamiento disponible y que su médico considere el más adecuado para su enfermedad, pero es posible que no se le pueda seguir administrando la medicación del estudio. Por lo tanto, ni el investigador ni el promotor adquieren compromiso alguno de mantener dicho tratamiento fuera de este estudio.

### **CONTACTO EN CASO DE DUDAS**

Si durante su participación tiene alguna duda o necesita obtener más información, póngase en contacto con Dr/a \_\_\_\_\_  
y teléfono \_\_\_\_\_.

Código del Protocolo: HUB-IDIBELL-SAFO-4.3.1  
EudraCT num: 2018-001207-37

## **CONSENTIMIENTO INFORMADO**

**Título del estudio:** “Ensayo clínico de fase IV-III, con asignación aleatoria, controlado, abierto y multicéntrico, con dos grupos paralelos, para evaluar la eficacia de la combinación de Cloxacilina y Fosfomicina versus Cloxacilina en monoterapia en el tratamiento de la bacteriemia por *Staphylococcus aureus* sensible a la Meticilina”

**Código del estudio:** HUB-IDIBELL-SAFO-4.3.1.

**Promotor:** Dr. Miquel Pujol i Rojo del Servicio de Enfermedades Infecciosas del Hospital Universitari de Bellvitge.

**Investigador Principal:**

**Centro:**

Yo (nombre y apellidos): \_\_\_\_\_

- He leído la hoja de información que se me ha entregado.
- He podido hacer preguntas sobre el estudio.
- He recibido suficiente información sobre el estudio.
- He hablado con: \_\_\_\_\_ (nombre del investigador)
- Comprendo que mi participación es voluntaria.
- Comprendo que puedo retirarme del estudio cuando quiera, sin tener que dar explicaciones, sin que esto repercuta en mis cuidados médicos.
- Acepto que me comuniquen la información derivada de la investigación que pueda ser relevante para mí salud.

Recibiré una copia firmada y fechada de este documento de consentimiento informado.  
Presto libremente mi conformidad para participar en el estudio.

Firma del participante  
Fecha: \_\_\_\_/\_\_\_\_/\_\_\_\_  
(Nombre, firma y fecha de puño y letra por el paciente)

Firma del investigador  
Fecha: \_\_\_\_/\_\_\_\_/\_\_\_\_

Cuando se obtenga el CI en personas con capacidad modificada para dar su CI.

Firma del representante legal, familiar o  
persona vinculada de hecho  
Fecha: \_\_\_\_/\_\_\_\_/\_\_\_\_  
(Nombre, firma y fecha de puño y letra por el representante)

Firma del investigador  
Fecha: \_\_\_\_/\_\_\_\_/\_\_\_\_

Versión 4.0 del 10 de junio de 2020

Página 8 de 10

Código del Protocolo: HUB-IDIBELL-SAFO-4.3.1  
EudraCT num: 2018-001207-37

## **CONSENTIMIENTO INFORMADO ORAL ANTE TESTIGOS**

**Título del estudio:** “Ensayo clínico de fase IV-III, con asignación aleatoria, controlado, abierto y multicéntrico, con dos grupos paralelos, para evaluar la eficacia de la combinación de Cloxacilina y Fosfomicina versus Cloxacilina en monoterapia en el tratamiento de la bacteriemia por *Staphylococcus aureus* sensible a la Meticilina”

**Código del estudio:** HUB-IDIBELL-SAFO-4.3.1.

**Promotor:** Dr. Miquel Pujol i Rojo del Servicio de Enfermedades Infecciosas del Hospital Universitari de Bellvitge.

**Investigador Principal:**

**Centro:**

Yo, \_\_\_\_\_ (*nombre y apellidos del testigo*),  
como testigo, afirmo que en mi presencia se ha informado a D/D<sup>a</sup> \_\_\_\_\_ (*nombre y apellidos del participante*) y se  
ha leído la hoja de información que se le ha entregado sobre el estudio, de modo que:

- Ha podido hacer preguntas sobre el estudio.
- Ha recibido suficiente información sobre el estudio.
- Ha hablado con: \_\_\_\_\_ (*nombre del investigador*)
- Comprende que su participación es voluntaria.
- Comprende que puede retirarme del estudio cuando quiera, sin tener que dar explicaciones, sin que esto repercuta en sus cuidados médicos.
- Acepta que le comuniquen la información derivada de la investigación que pueda ser relevante para su salud.

Recibiré una copia firmada y fechada de este documento de consentimiento informado.

Firma del testigo

Fecha: \_\_\_\_/\_\_\_\_/\_\_\_\_

(Nombre, fecha y firma de puño y letra por el paciente/testigo)

Firma del investigador

Fecha: \_\_\_\_/\_\_\_\_/\_\_\_\_

Código del Protocolo: HUB-IDIBELL-SAFO-4.3.1  
EudraCT num: 2018-001207-37

### **CONSENTIMIENTO INFORMADO ORAL ANTE TESTIGOS**

El participante del estudio ha indicado que no puede leer /escribir.

Un miembro del personal del estudio le ha leído el documento de consentimiento, lo ha revisado y comentado con el participante y se le ha concedido la oportunidad de hacer preguntas o consultarlo con otras personas.

El testigo ha de ser una persona imparcial, ajena al estudio.
